# Supplementary material
Source: publisher site journal article supplement (https://www.dovepress.com/article/292161)
Supplement: Supplementary file 1 [file get_supplementary_file.php]

**Supplementary Material:**


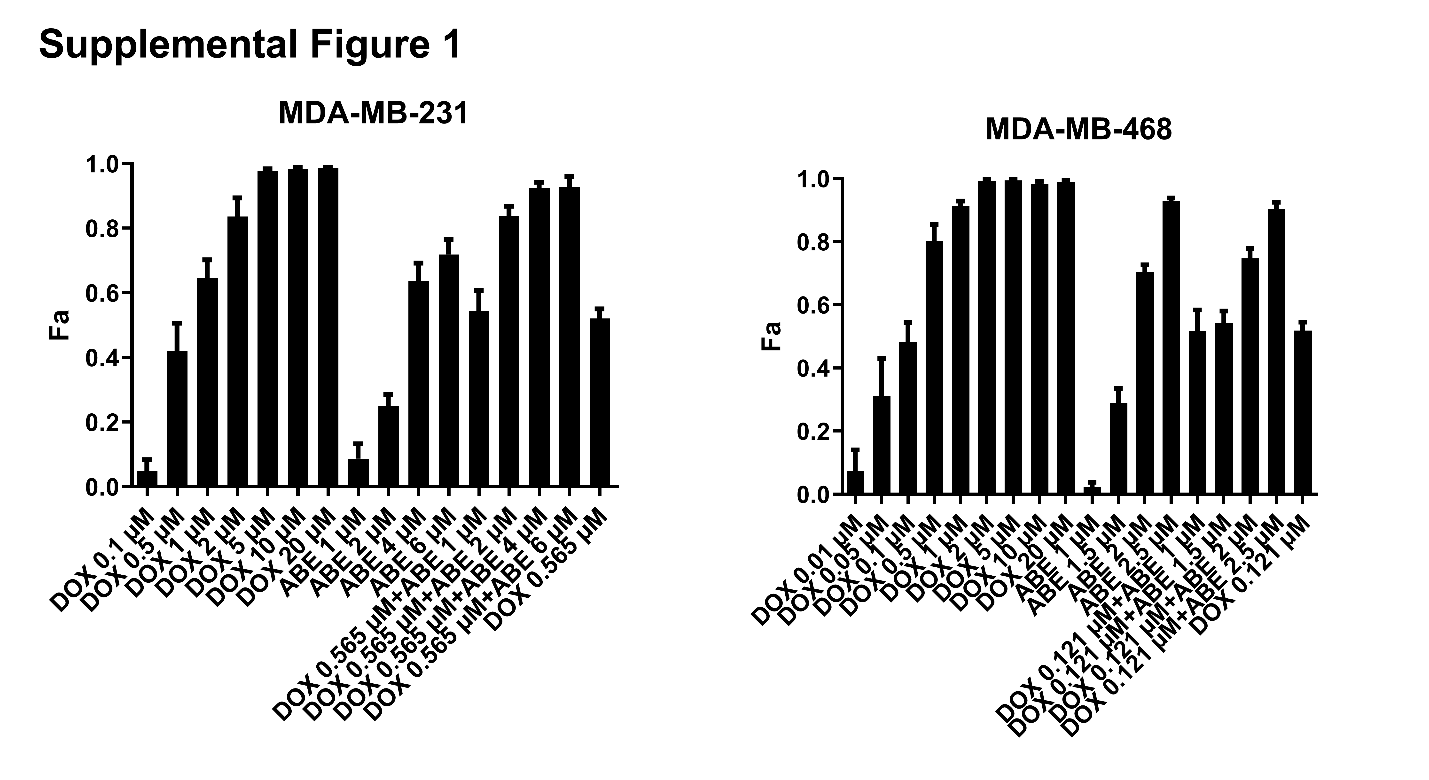


**Figure S1.** Concentrations used by Compusyn to calculate synergy between IC50 doxorubicin (DOX at 0.565 and 0.121 µM for MDA-MB-231 and MDA-MB-468) and abemaciclib (ABE). Fractional inhibition (Fa) was calculated for DOX (0.1-20 µM for MDA-MB-231 and 0.01-20 µM for MDA-MB-468), ABE (1-6 µM and 1-2.5 µM), and DOX IC50 with ABE. Bars represent the mean values (n=6) along with the standard error on the mean. and


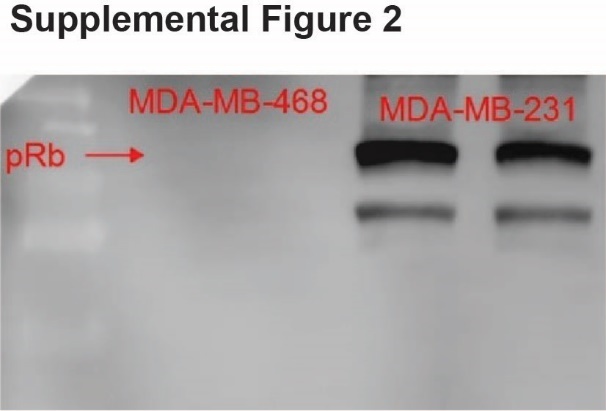


**Figure S2:** Western blot image of phosphorylated retinoblastoma protein (pRb; Ser780) in MDA-MB-468 (negative control) and MDA-MB-231 (positive control) cells. Samples were run in duplicate.

**Table S1:** Summary of clinical doxorubicin data used for population pharmacokinetic analysis.

| Dose (mg/m2) | BSA (m2) | Dox Presented | Infusion Time (hr) | Data | Measurement Technique | LOQ (μg/mL) | Reference | |
| --- | --- | --- | --- | --- | --- | --- | --- | --- |
| 10 | 1.71 | Total DOX | 0.25 | Mean (n=9) | HPLC | 0.01 | [1] | |
| 20 | 1.71 | Total DOX | 0.25 | Mean (n=9) | HPLC | 0.01 | [1] | |
| 25 | 1.71 | Free DOX | 0.167 | Mean (n=3) | HPLC | 0.025 | [2] | |
| 25 | 1.71 | L_DOX | 0.167 | Mean (n=8) | HPLC | 0.025 | [2] | |
| 40 | 1.71 | Total DOX | 0.25 | Mean (n=9) | HPLC | 0.01 | [1] | |
| 50 | 1.71 | L_DOX | 0.167 | Mean (n=14) | HPLC | 0.025 | [2] | |
| 50 | 1.531 | Total DOX | 1 | Mean (n=24) | LC-MS/MS | 0.25 | [3] | |
| 50 | 1.508 | Total DOX | 1 | Mean (n=41) | LC-MS/MS | 0.25 | [3] | |
| 50 | 1.531 | L_DOX | 1 | Mean (n=24) | LC-MS/MS | 1 | [3] | |
| 50 | 1.508 | L_DOX | 1 | Mean (n=41) | LC-MS/MS | 1 | [3] | |
| 50 | 1.75 | Free DOX | 0.25 | Mean (n=12) | HPLC | 0.001 | [4] | |
| 60 | 1.67 | Free DOX | 0.667 | Mean (n=3) | HPLC | 0.01 | [5] | |
| 60 | 1.9 | Free DOX | 0.167 | Mean (n=19) | HPLC | 0.001 | [6] | |
| 60 | 1.71 | Free DOX | 0.083 | Mean (n=8) | HPLC | 0.0025 | [7] | |
| 60 | 1.71 | Free DOX | 0.25 | Mean (n=11) | HPLC | 0.01 | [8] | |
| 75 | 1.71 | Free DOX | 0.25 | Mean (n=10) | HPLC | 0.001 | [9] | |
| LOQ, the lower limit of quantification  DOX, free doxorubicin; Free DOX = bDOX + uDOX  uDOX = fu ∙ DOX; bDOX = (1-fu) ∙ DOX  fu = 0.75 [10] | | | | | | | |
| L_DOX, pegylated liposomal doxorubicin.  Total DOX = Free DOX + L_DOX | | | | | | | |  |
|  | | | | | | | |


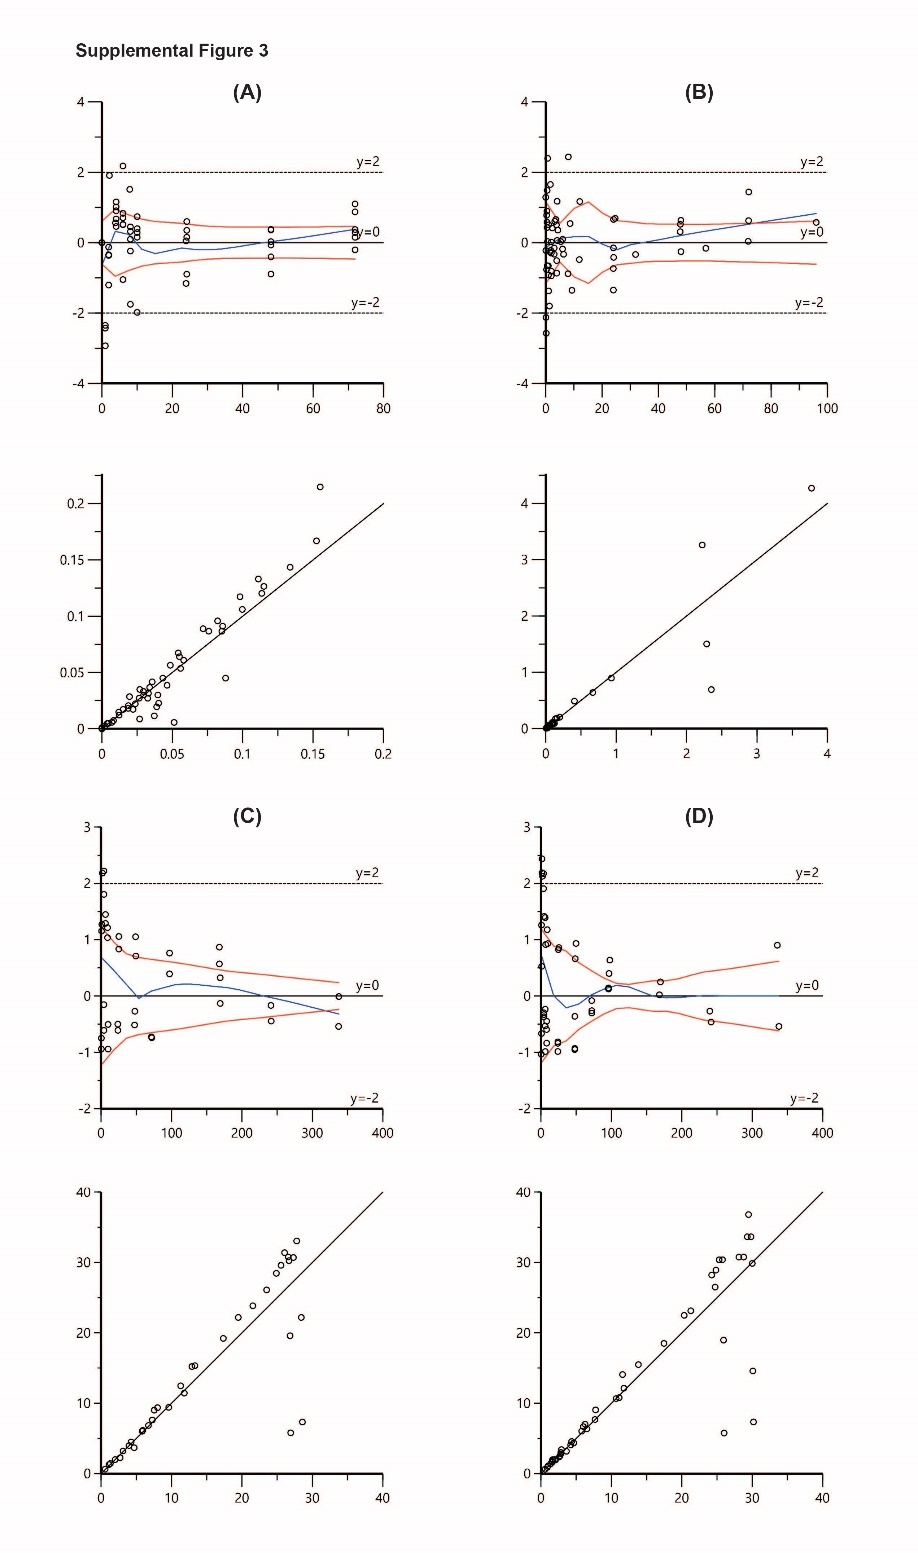


**Figure S3:** Goodness-of-fit plots for the final population pharmacokinetic models for **(A)** abemaciclib, **(B)** free doxorubicin, **(C)** pegylated liposomal doxorubicin, and **(D)** total doxorubicin. In the upper plots, the x-axes represent time (hour), the y-axes represent conditional weighted residuals, and the blue lines represent the observed trend of the data. In the lower plots, the x-axes represent time individual predicted concentrations (µg/mL), the y-axes represent observed drug concentrations in the plasma (µg/mL), and the solid black lines represent the reference line in the diagnostic plot.


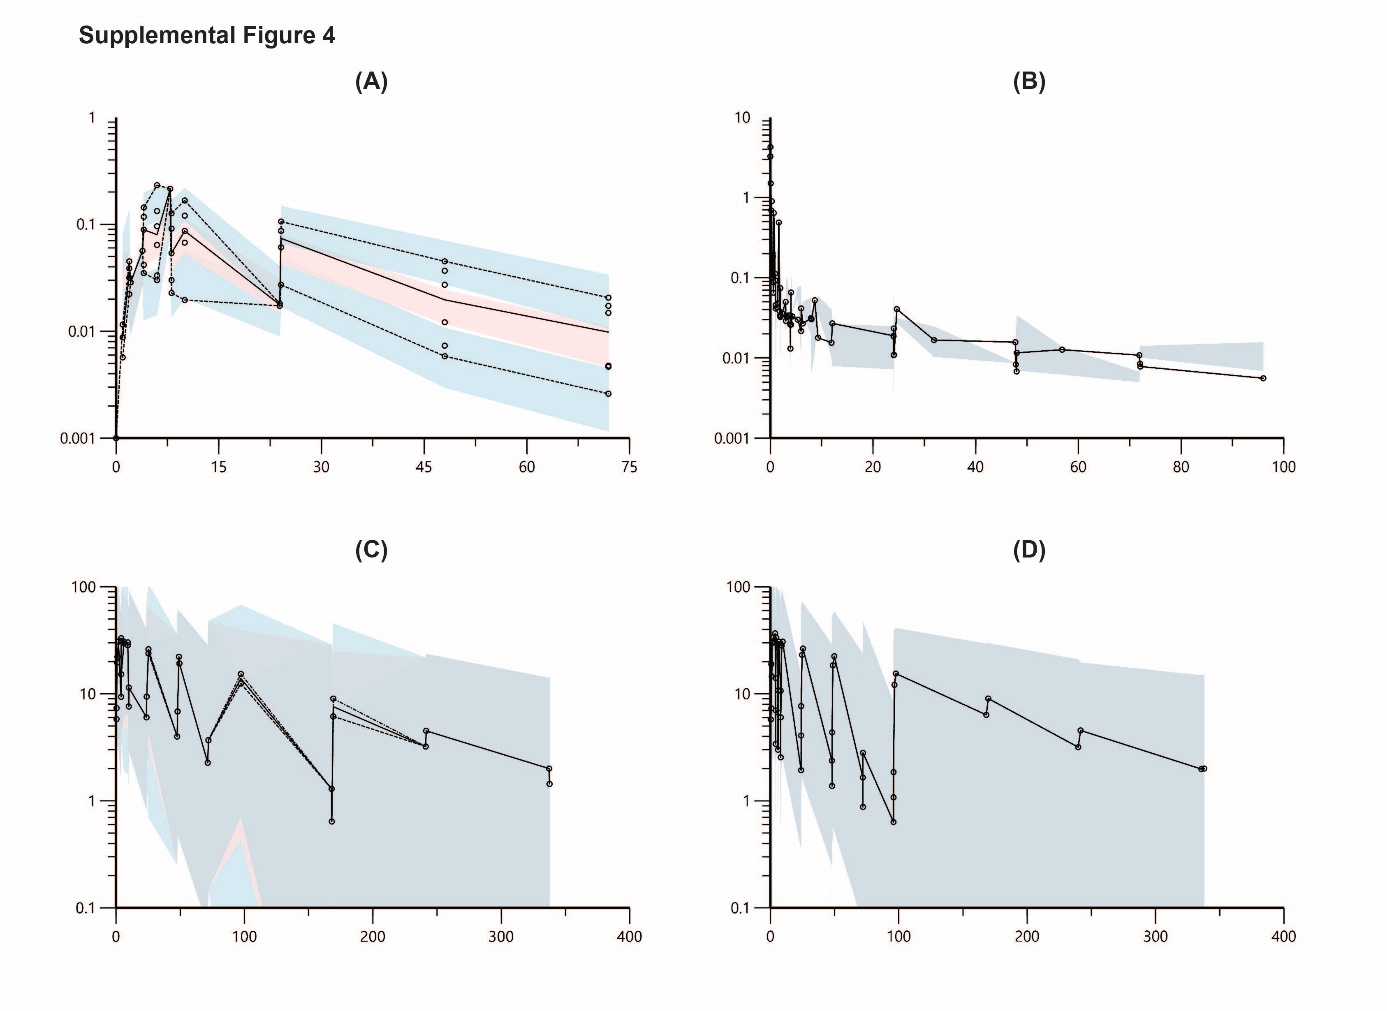


**Figure S4:** Visual predictive check (VPC) for the final population pharmacokinetic models for **(A)** abemaciclib, **(B)** free doxorubicin, **(C)** pegylated liposomal doxorubicin, and **(D)** total doxorubicin. The x axes represents time (hr), and the y axes represent drug concentrations (µg/mL).The solid black lines represent the 50th observed percentile of the observations, and the dashed lines represent the 5th and 95th percentiles of observations. The red-shaded area represents the 95% confidence interval (95% CI) for the 50th percentile of the simulated data, and the blue shaded area is the 95% CI for 5th and 95th percentiles of the simulated data.

**References**

1. Northfelt DW, Martin FJ, Working P, Volberding PA, Russell J, Newman M, Amantea MA, Kaplan LD: **Doxorubicin encapsulated in liposomes containing surface-bound polyethylene glycol: pharmacokinetics, tumor localization, and safety in patients with AIDS-related Kaposi's sarcoma**. *Journal of clinical pharmacology* 1996, **36**(1):55-63.

2. Gabizon A, Catane R, Uziely B, Kaufman B, Safra T, Cohen R, Martin F, Huang A, Barenholz Y: **Prolonged circulation time and enhanced accumulation in malignant exudates of doxorubicin encapsulated in polyethylene-glycol coated liposomes**. *Cancer research* 1994, **54**(4):987-992.

3. Bhowmik S, Bhowmick S, Maiti K, Chakra A, Shahi P, Jain D, Rajamannar T: **Two multicenter Phase I randomized trials to compare the bioequivalence and safety of a generic doxorubicin hydrochloride liposome injection with Doxil((R)) or Caelyx((R)) in advanced ovarian cancer**. *Cancer chemotherapy and pharmacology* 2018, **82**(3):521-532.

4. Rosing H, ten Bokkel Huinink WW, van Gijn R, Rombouts RF, Bult A, Beijnen JH: **Comparative open, randomized, cross-over bioequivalence study of two intravenous dexrazoxane formulations (Cardioxane and ICRF-187) in patients with advanced breast cancer, treated with 5-fluorouracil-doxorubicin-cyclophosphamide (FDC)**. *European journal of drug metabolism and pharmacokinetics* 1999, **24**(1):69-77.

5. Barpe DR, Rosa DD, Froehlich PE: **Pharmacokinetic evaluation of doxorubicin plasma levels in normal and overweight patients with breast cancer and simulation of dose adjustment by different indexes of body mass**. *European journal of pharmaceutical sciences : official journal of the European Federation for Pharmaceutical Sciences* 2010, **41**(3-4):458-463.

6. Blaes A, Duprez D, Defor T, Shanley R, Beckwith H, Haddad T, Potter D, Yee D, Sanghavi K, Jacobson P: **Angiotensin Converting Enzyme Inhibitors (ACEI) and doxorubicin pharmacokinetics in women receiving adjuvant breast cancer treatment**. *SpringerPlus* 2015, **4**:32.

7. Gianni L, Vigano L, Locatelli A, Capri G, Giani A, Tarenzi E, Bonadonna G: **Human pharmacokinetic characterization and in vitro study of the interaction between doxorubicin and paclitaxel in patients with breast cancer**. *Journal of clinical oncology : official journal of the American Society of Clinical Oncology* 1997, **15**(5):1906-1915.

8. Wurz GT, Soc L, Emshoff VD, Cadman TB, DeGregorio MW: **Pharmacokinetic analysis of high-dose toremifene in combination with doxorubicin**. *Cancer chemotherapy and pharmacology* 1998, **42**(5):363-366.

9. Greene RF, Collins JM, Jenkins JF, Speyer JL, Myers CE: **Plasma pharmacokinetics of adriamycin and adriamycinol: implications for the design of in vitro experiments and treatment protocols**. *Cancer research* 1983, **43**(7):3417-3421.

10. **Doxorubicin Hydrochloride for Injection, USP**. In*.* Edited by Company PU. Kalamazoo, MI; 2003.
